# Supplementary material for: Aedes aegypti Beta-1,3-Glucan-Binding Protein Inhibits Dengue and ZIKA Virus Replication
Source: MDPI journal article supplement (doi:10.3390/biomedicines12010088), 2024-01-01
Supplement: s1 [file s1]

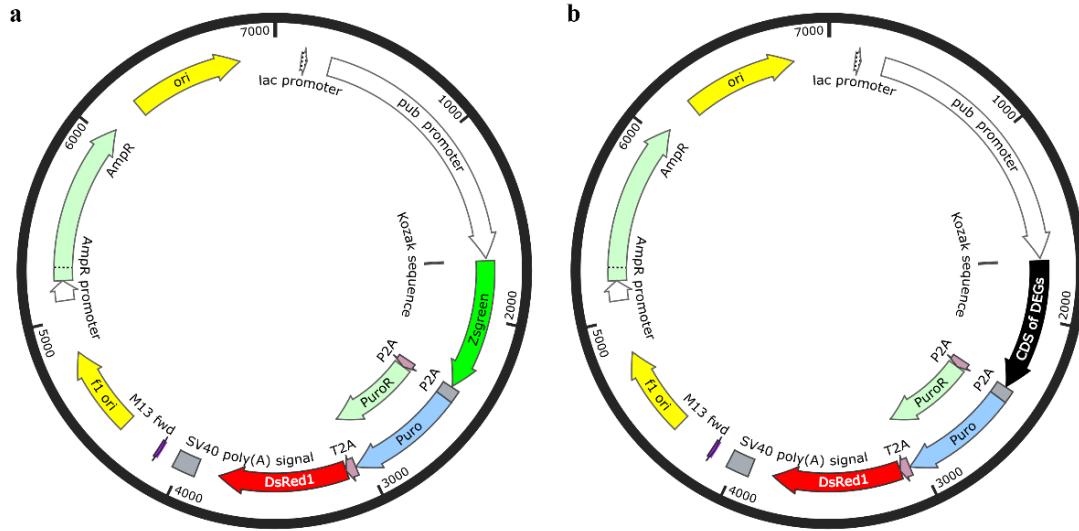

Figure S1. Constructed control plasmid vector (EGFP) (a) and experimental plasmid vector (b). Pub promoter is the polyubiquitin promoter sequence of *Aedes mosquito*, which has significant effects in enhancing the long-term and stability of gene expression. ZsGreen means Enhanced Green Fluorescent Protein (EGFP). DsRed means Red Fluorescent Protein. CDS of DEGs represents the protein coding sequences of *GNBPB6*.
